# Supplementary material for: Multifunctional Magnetic CuS/Gd2O3 Nanoparticles for Fluorescence/Magnetic Resonance Bimodal Imaging-Guided Photothermal-Intensified Chemodynamic Synergetic Therapy of Targeted Tumors
Source: PubMed Central journal article supplement — ACS Appl Mater Interfaces. 2022 Jul 25;14(30):34365–76. doi: 10.1021/acsami.2c06503 (PMC9354791; doi:10.1021/acsami.2c06503), 2022-07-25
Supplement: am2c06503_si_001.pdf [file am2c06503_si_001.pdf]

## SUPPORTING INFORMATION

### **Multifunctional Magnetic CuS/Gd<sub>2</sub>O<sub>3</sub> Nanoparticles for Fluorescence/MR Bimodal Imaging-guided Photothermal-intensified Chemodynamic Synergetic Therapy of Targeted Tumors**

Minchuan Luo<sup>1</sup>, Hiroshi Yukawa<sup>1,2,3,4,5\*</sup>, Kazuhide Sato<sup>2,4,6</sup>, Makoto Tozawa<sup>7</sup>, Masato Tokunaga<sup>1</sup>, Tatsuya Kameyama<sup>7</sup>, Tsukasa Torimoto<sup>7</sup> and Yoshinobu Baba<sup>1,2,3\*</sup>

1. Nanobio Analytical Chemistry, Biomolecular Chemistry, Department of Biomolecular Engineering, Graduate School of Engineering, Nagoya University, Furo-cho, Chikusa-ku, Nagoya 464-8603, Japan

2. Institute of Nano-Life-Systems, Institutes of Innovation for Future Society, Nagoya University, Furo-cho, Chikusa-ku, Nagoya 464-8603, Japan

3. Institute of Quantum Life Science, Quantum Life and Medical Science Directorate, National Institutes for Quantum Science and Technology, Anagawa, Inageku, Chiba 263-8555, Japan

4. Nagoya University Institute for Advanced Research, Advanced Analytical and Diagnostic Imaging Center (AADIC)/Medical Engineering Unit (MEU), B3 Unit, Tsurumai 65, Showa-ku, Nagoya 466-8550, Japan

5. Development of Quantum-nano Cancer Photoimmunotherapy for Clinical Application of Refractory Cancer, Nagoya University, Tsurumai 65, Showa-ku, Nagoya 466-8550, Japan

6. Nagoya University Institute for Advanced Research, S-YLC, Furo-cho, Chikusa-ku,  
Nagoya 464-8603, Japan

7. Material Design Chemistry, Department of Materials Chemistry, Graduate School  
of Engineering, Nagoya University, Furo-cho, Chikusa-ku, Nagoya 464-8603, Japan

\*Corresponding authors

E-mail: h.yukawa@nanobio.nagoya-u.ac.jp & babaymtt@chembio.nagoya-u.ac.jp

Tel: +81-52-789-5654, Fax: +81-52-789-5117

### Table of Contents

|   | Content                     | Page   |
|---|-----------------------------|--------|
| 1 | Supplementary Figures S1-22 | S3-12  |
| 2 | Tables S1-2                 | S13-14 |
| 3 | Note S1                     | S15    |
| 4 | References 1-16             | S16-18 |

## SUPPLEMENTARY FIGURES

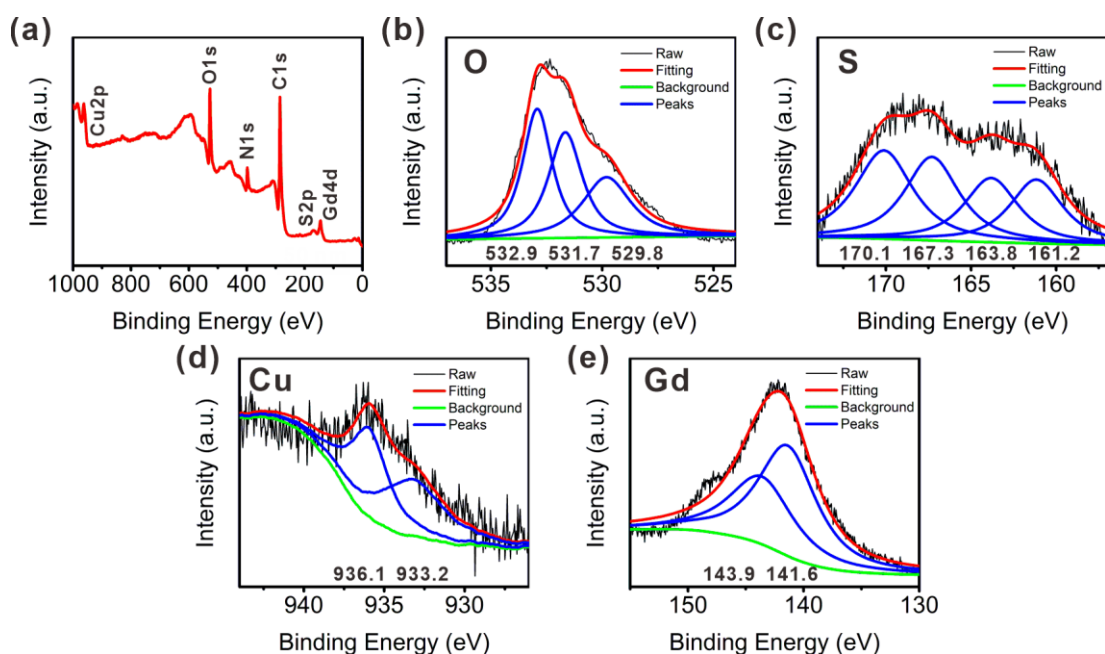

**Figure S1.** XPS spectra of BCG. (a) Original spectrum. (b) Characteristic peaks of O 1s ( $-\text{COOH}$  and  $-\text{OH}$  in BSA: 532.9 eV,  $\text{Gd}(\text{OH})_3$ : 531.7 eV,  $\text{Gd}_2\text{O}_3$ : 529.8 eV). (c) Characteristic peaks of S 2p ( $\text{CuSO}_4$ : 170.1 eV and 167.3 eV,  $\text{CuS}$ : 163.8 eV and 161.2 eV). (d) Characteristic peaks of Cu 2p ( $\text{CuS}$ : 933.2 eV). (e) Characteristic peaks of Gd 4d ( $\text{Gd}_2\text{O}_3$ : 143.9 eV,  $\text{Gd}(\text{OH})_3$ : 141.6 eV).<sup>1, 2</sup>

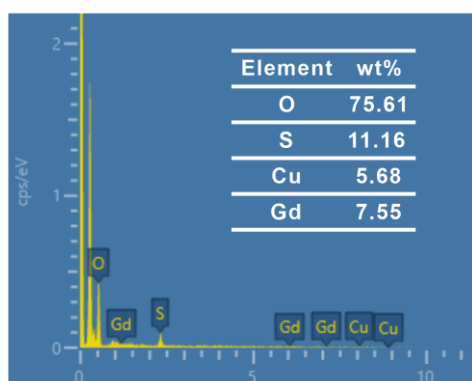

**Figure S2.** The EDS analysis of BCG and wt% for O, S, Cu and Gd elements.

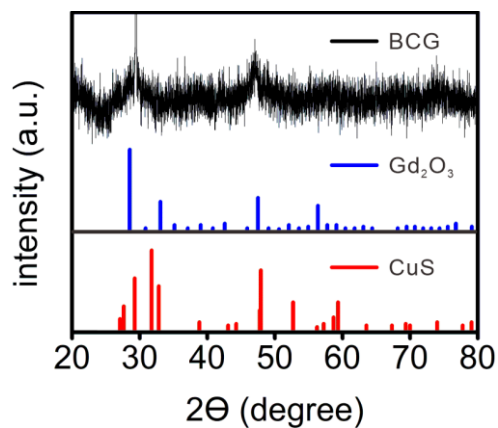

**Figure S3.** Powder XRD patterns of BCG, as referenced by the standard hexagonal CuS (JCPDS 06-0464) and cubic Gd<sub>2</sub>O<sub>3</sub> (JCPDS 12-0797), in which 1/8 of the original mass of BSA was used to synthesize BCG to reduce the interference towards the signal of CuS and Gd<sub>2</sub>O<sub>3</sub>.

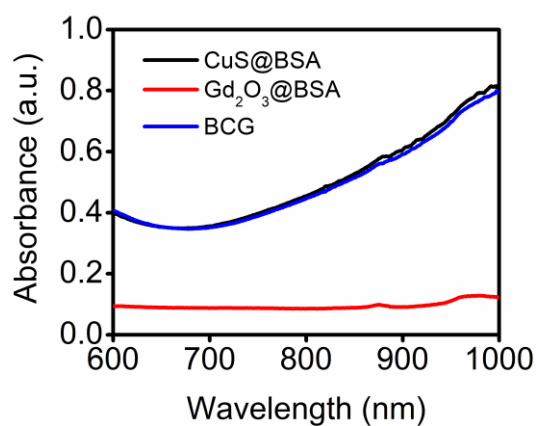

**Figure S4.** Absorption spectra of CuS capped by BSA, Gd<sub>2</sub>O<sub>3</sub> capped by BSA and BCG (20 mg/mL) with similar synthesis conditions.

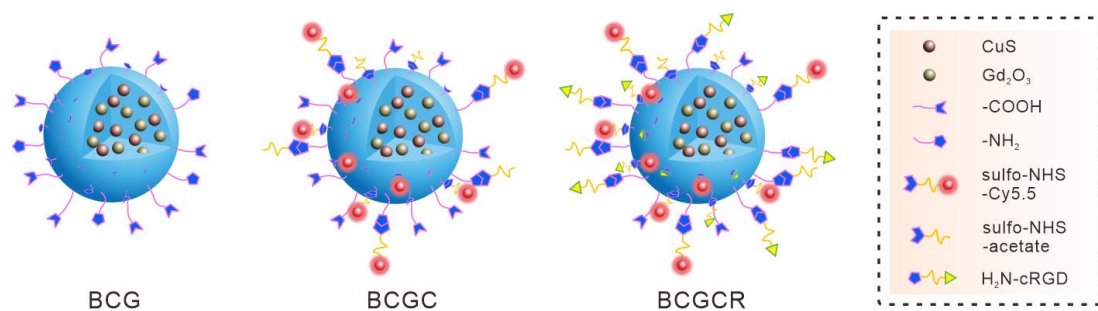

**Figure S5.** Cartoon diagrams of BSA-CuS-Gd<sub>2</sub>O<sub>3</sub> (BCG), BSA-CuS-Gd<sub>2</sub>O<sub>3</sub>-Cy5.5 (BCGC) and BSA-CuS-Gd<sub>2</sub>O<sub>3</sub>-Cy5.5-RGD (BCGCR).

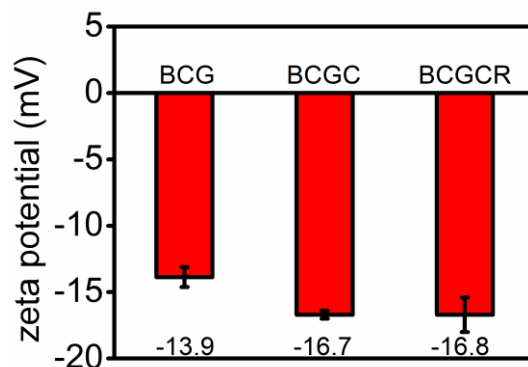

**Figure S6.** Zeta potentials of BCG, BCGC and BCGCR.

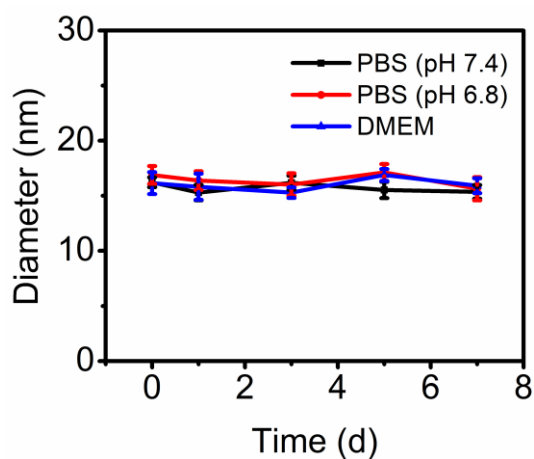

**Figure S7.** A long-term size investigation of BCGCR in PBS (pH 7.4), PBS (pH 6.8) and DMEM using a DLS analysis.

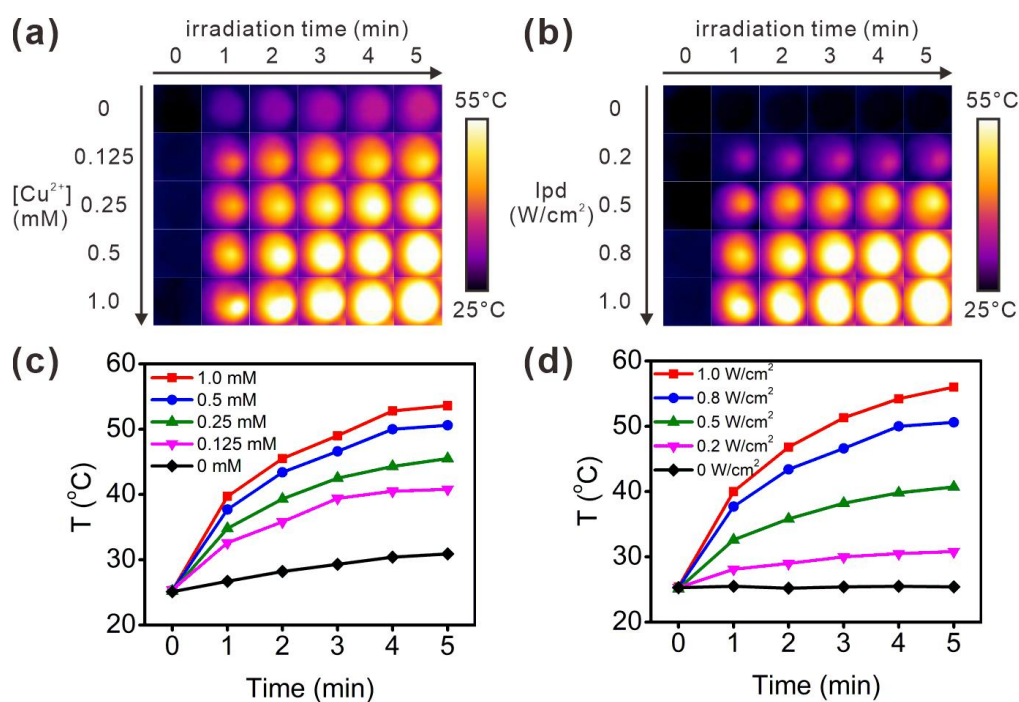

**Figure S8.** IR thermal images and average temperature variations of BCGCR solution under 980 nm laser irradiation for 5 min. (a & c) Different concentrations of BCGCR (0~1.0 mM  $Cu^{2+}$ ) with a power density of 0.8  $W/cm^2$ . (b & d) BCGCR (0.5 mM  $Cu^{2+}$ ) with different laser power densities (lpd) (0~1  $W/cm^2$ ).

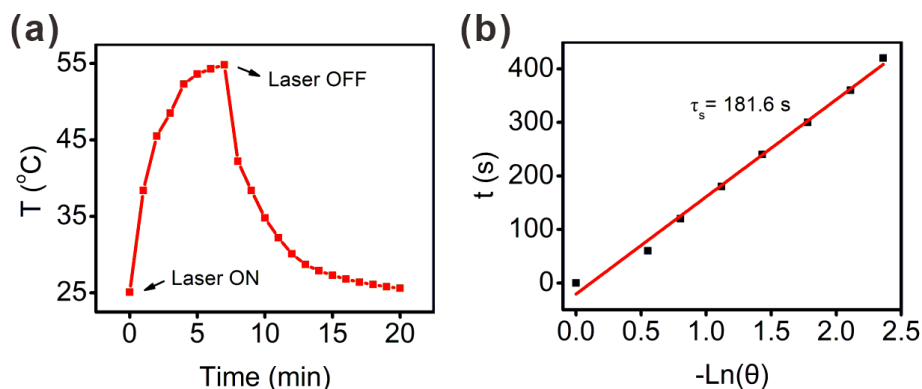

**Figure S9.** PCE evaluation of BCGCR. (a) Temperature variation of BCGCR solution (1 mM  $Cu^{2+}$ ) under 980 nm laser irradiation (0.8  $W/cm^2$ ) for 7 min followed by natural cooling. (b) Measurement of the thermal time constant ( $\tau_s$ ) by linear fit of the time point  $t$  vs ( $-\ln\theta$ ) during the natural cooling period. The PCE was calculated as 30.3% according to Note S1.

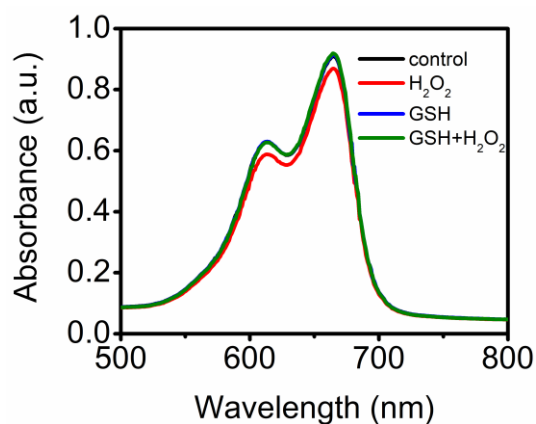

**Figure S10.** Absorption spectra of (10 µg/mL) MB with H<sub>2</sub>O<sub>2</sub> (20 mM), GSH (1 mM) or H<sub>2</sub>O<sub>2</sub> + GSH at pH 5.4 for 5 min.

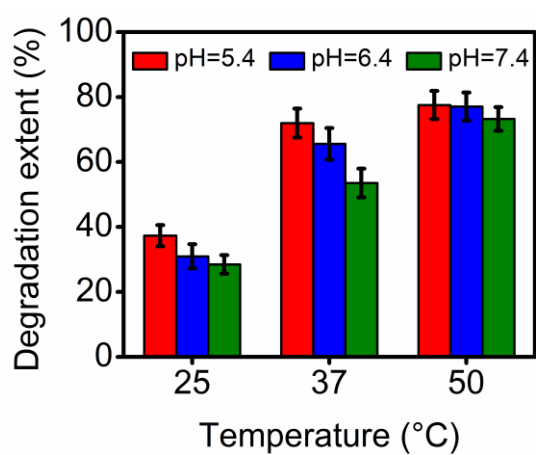

**Figure S11.** The extent of MB (10 µg/mL) degradation reflected by decreased absorbance after incubation with BCG-GSH (0.5 mM Cu<sup>2+</sup>) and H<sub>2</sub>O<sub>2</sub> (20 mM) at varying pH values and temperatures for 20 min.

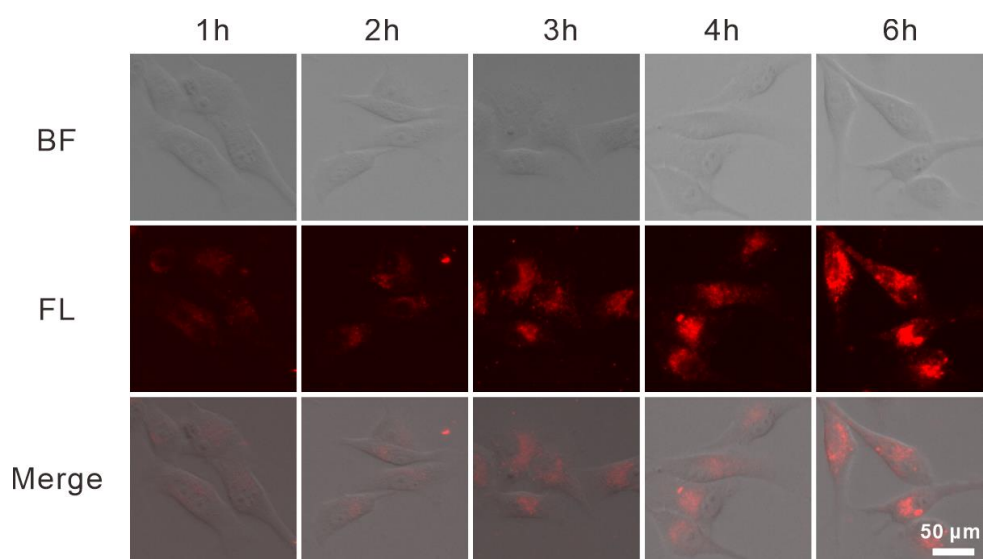

**Figure S12.** Fluorescence images of U87MG cells after incubation with BCGCR (100  $\mu\text{g}/\text{mL}$ ) for 1, 2, 3, 4, and 6 h.

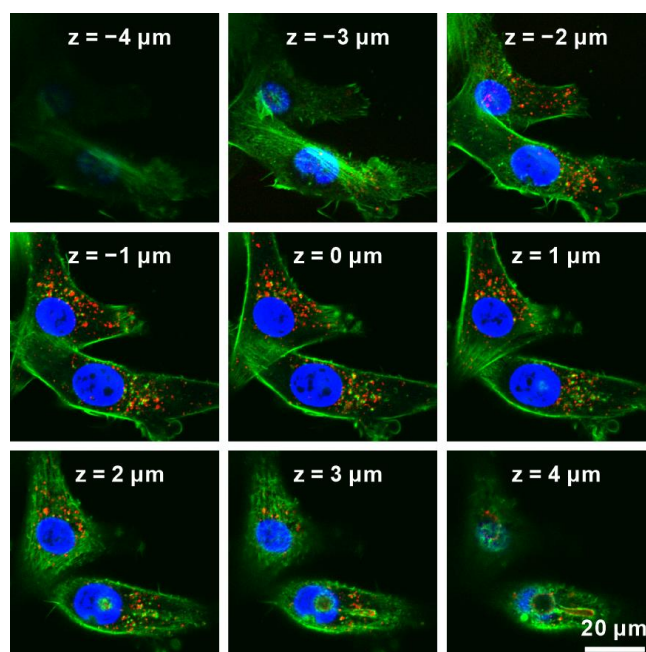

**Figure S13.** A set of confocal fluorescence images at different depths of U87MG cells incubated with BCGCR (50  $\mu\text{g}/\text{mL}$ ) (red) for 2 h, followed by co-staining with 0.1  $\mu\text{g}/\text{mL}$  Hoechst 33342 (blue) and 300 nM Alexa Fluor™ 488 Phalloidin (green) for 30 min.



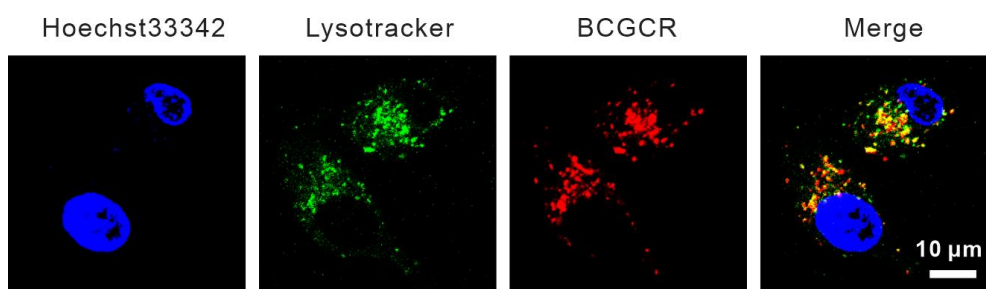

**Figure S14.** Colocalization study of U87MG cells after incubation with BCGCR (50  $\mu\text{g}/\text{mL}$ ) (red) for 2 h, followed by co-staining with 0.1  $\mu\text{g}/\text{mL}$  Hoechst 33342 (blue) and 200 nM Lysotracker (green) for 20 min.

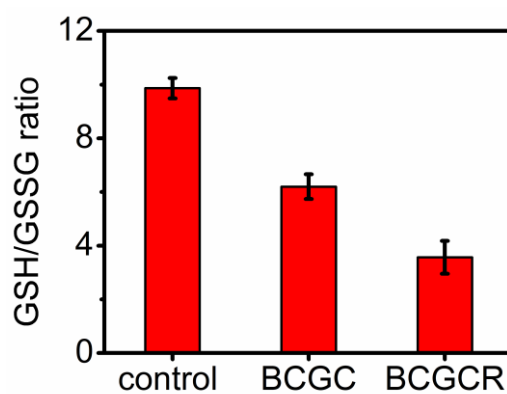

**Figure S15.** The GSH level in U87MG cells (untreated, incubated with 100  $\mu\text{g}/\text{mL}$  BCGC or BCGCR, 6 h).

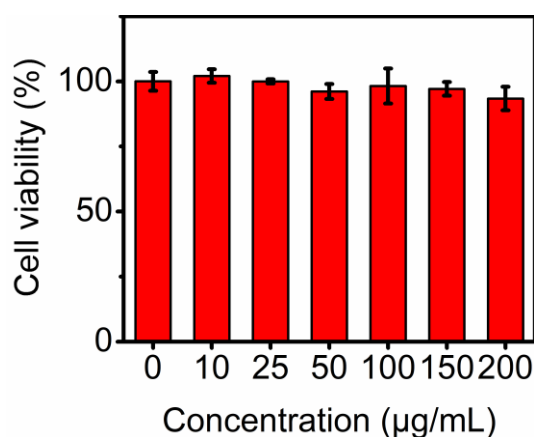

**Figure S16.** HEK293T cell viability after incubation with different concentrations of BCGCR for 24 h.

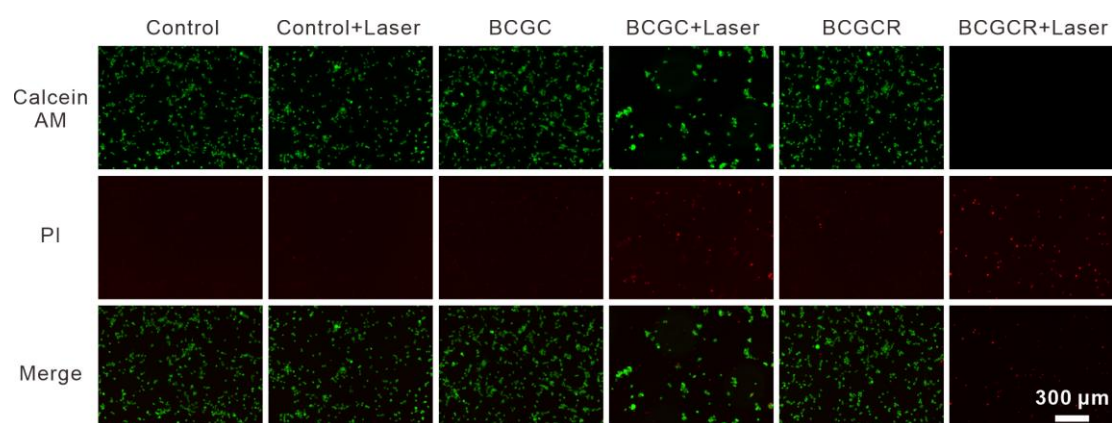

**Figure S17.** Fluorescence images of live (green) and dead (red) U87MG cells. Cells were incubated with BCGC or BCGCR (200  $\mu\text{g}/\text{mL}$ ) for 24 h followed by exposure under laser irradiation (or non-exposure) (980 nm, 0.8  $\text{W}/\text{cm}^2$ ) for 5 min, and stained with Calcein AM and PI for 30 min.

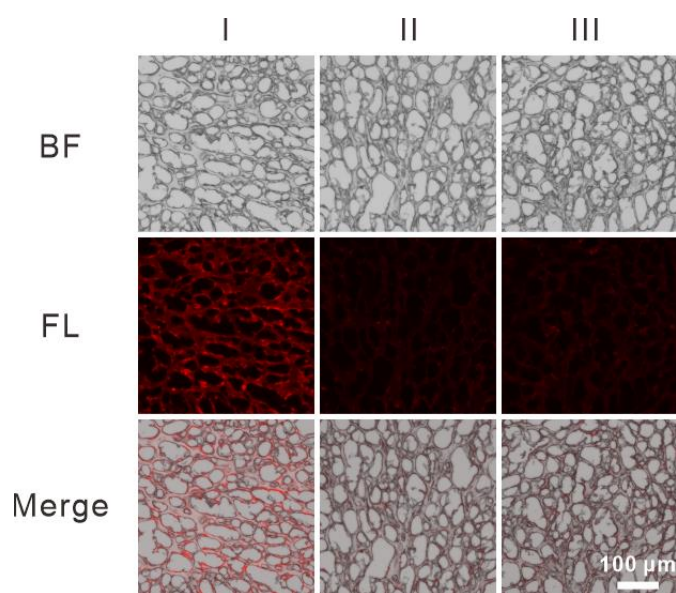

**Figure S18.** Fluorescence images of tumor tissue slices resected from U87MG tumor bearing mice at 2 days after (I) i.v. injection of BCGCR (5 mg/kg, 100  $\mu\text{L}$ ), (II) i.t. injection of free cRGDfk (2 mM, 100  $\mu\text{L}$ ) followed by i.v. injection of BCGCR (5 mg/kg, 100  $\mu\text{L}$ ) 1 h later, (III) i.v. injection of BCGC (5 mg/kg, 100  $\mu\text{L}$ ).

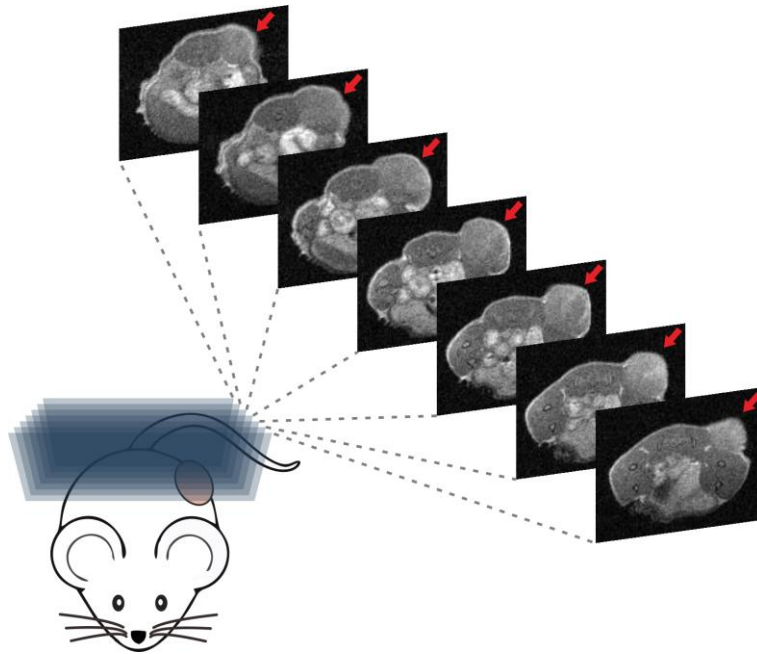

**Figure S19.** T<sub>1</sub>-weighted multi-slice MR images of mice at 2 days after the i.v. injection of BCGCR (20 μmol/kg Gd<sup>3+</sup>, 200 μL) (TR/TE = 500/9.0 ms at 1.5 T). Red arrows indicate tumor locations in mice.

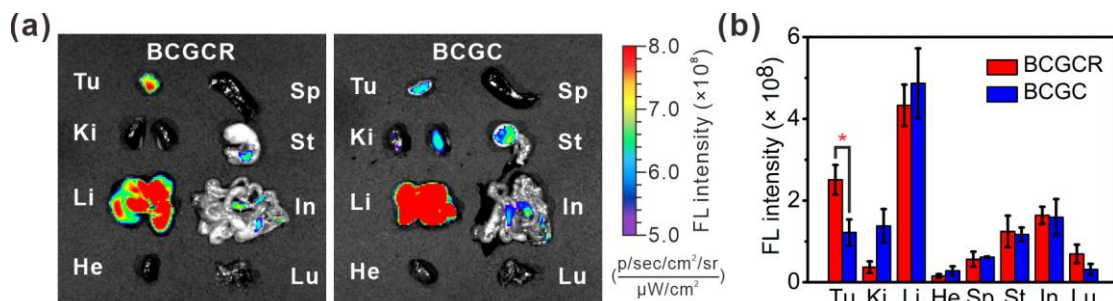

**Figure S20.** Study of fluorescence distribution in U87MG tumors and main organs. (a) Fluorescence images of tumors and main organs resected from mice at 2 days after i.v. injection of BCGC or BCGCR (2 mg/kg, 50 μL) (Ex: 675 nm, Em: 720 nm). Tu: tumor; Ki: kidneys; Li: liver; He: heart; Sp: spleen; St: stomach; In: intestines; Lu: lungs. (b) Statistics of average FL intensity of tumors and main organs in (a). Values denote the mean ± SD (n = 3, \*P < 0.05).

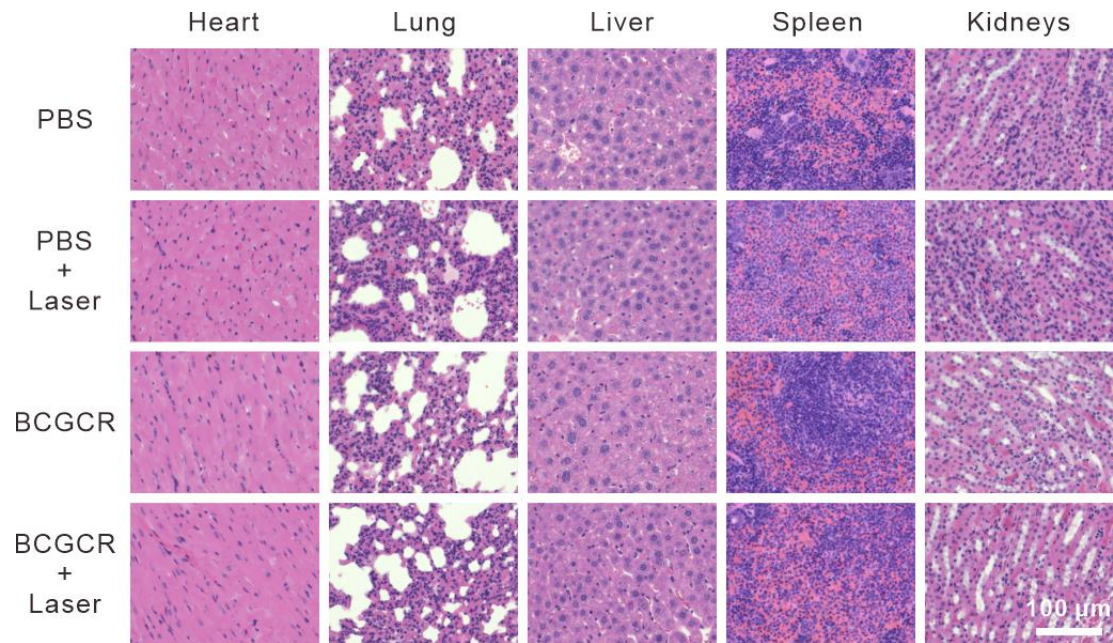

**Figure S21.** H&E-stained images of major organs including the heart, lungs, liver, spleen and kidneys resected from mice on the 15<sup>th</sup> day after the indicated treatments.

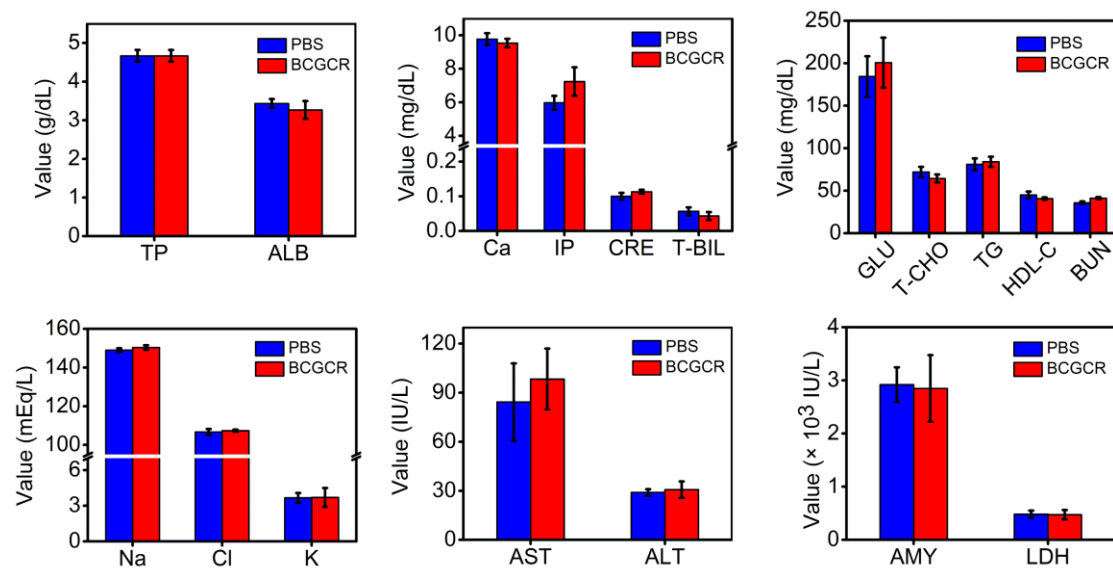

**Figure S22.** Blood routine examinations of mice at 15 days post-injection of 100 μL PBS or BCGCR (5 mg/kg Cu<sup>2+</sup>).

## TABLES

**Table S1. PCE Comparison between reported CuS NPs and BCGCR**

| CuS NPs                                 | Irradiation wavelength (nm) | PCE (%)     | Reference        |
|-----------------------------------------|-----------------------------|-------------|------------------|
| Gd:CuS@BSA                              | 980                         | 32.3        | 1                |
| Gd <sub>2</sub> O <sub>3</sub> /CuS NDs | 785                         | 45.5        | 3                |
| T-MAN                                   | 808                         | 70.1        | 4                |
| PFN                                     | 1064                        | 30.17       | 5                |
| BSA@CuS@DOX                             | 1064                        | 52.81       | 6                |
| Gd/CuS@PEI-FA-PS                        | 1064                        | 26.7        | 7                |
| IONF@CuS                                | 1064                        | 42          | 8                |
| RGD-CuS DENPs                           | 1064                        | 49.8        | 9                |
| CuSCDs                                  | 808                         | 39.7        | 10               |
| CuS-MnS <sub>2</sub>                    | 808                         | 67.5        | 11               |
| Cu <sub>2</sub> MnS <sub>2</sub>        | 1064                        | 49.4        | 12               |
| HCuS@Cu <sub>2</sub> S@Au               | 808                         | 35          | 13               |
| <b>BCGCR</b>                            | <b>980</b>                  | <b>30.3</b> | <b>This work</b> |

**Table S2. Comparison of treatment conditions between reported CuS NPs and BCGCR for tumor therapy.**

| CuS NPs                                 | Therapy               | Tumor cell line | Dose (mg/kg)       | Irradiation      |            | Power density (W/cm <sup>2</sup> ) | Reference        |
|-----------------------------------------|-----------------------|-----------------|--------------------|------------------|------------|------------------------------------|------------------|
|                                         |                       |                 |                    | $\lambda^a$ (nm) | Time (min) |                                    |                  |
| Gd:CuS@BSA                              | PTT                   | SK-OV-3         | 10                 | 980              | 5          | 0.8                                | 1                |
| Gd <sub>2</sub> O <sub>3</sub> /CuS NDs | PTT                   | 4T1             | 4.8                | 785              | 5          | 1.5                                | 3                |
| T-MAN                                   | PTT                   | MKN45           | 5                  | 808              | 10         | 0.8                                | 4                |
| PFN                                     | PTT/CDT               | Panc02          | 20                 | 1064             | 5          | 1.0                                | 5                |
| BSA@CuS@D OX                            | PTT/CT <sup>b</sup>   | 4T1             | 3 for DOX          | 1064             | 6          | 1.2                                | 6                |
| Gd/CuS@PEI-FA-PS                        | PTT                   | KB-LFA R        | ~3.5               | 1064             | 10         | 0.6                                | 7                |
| IONF@CuS                                | MHT <sup>c</sup> /PTT | PC3             | ~0.32 <sup>d</sup> | 1064             | 10         | 1.0                                | 8                |
| RGD-CuS DENPs                           | PTT/gene              | MDA-MB-231      | ~1.4               | 1064             | 5          | 0.6                                | 9                |
| CuSCDs                                  | PTT                   | 4T1             | 5 <sup>e</sup>     | 808              | 5          | 0.3                                | 10               |
| CuS-MnS <sub>2</sub>                    | PDT/PTT               | A2780           | ~0.56 <sup>d</sup> | 808              | 10         | 1.0                                | 11               |
| Cu <sub>2</sub> MnS <sub>2</sub>        | PTT                   | S180            | 20                 | 1064             | 10         | 0.6                                | 12               |
| HCuS@Cu <sub>2</sub> S@Au               | PTT                   | U87MG           | 13                 | 808              | 5          | 0.8                                | 13               |
| <b>BCGCR</b>                            | <b>PTT/CDT</b>        | <b>U87MG</b>    | <b>5</b>           | <b>980</b>       | <b>10</b>  | <b>0.8</b>                         | <b>This work</b> |

<sup>a</sup> $\lambda$ : wavelength; <sup>b</sup>CT: chemotherapy; <sup>c</sup>MHT: magnetic hyperthermia; <sup>d</sup>i.t. injection;

<sup>e</sup>injection every two days.

## NOTE S1. PCE Evaluation of BCGCR

PCE ( $\eta$ ) is used to evaluate the extent of conversion of absorbed light into temperature increase, which can be calculated according to the method of previous reports<sup>14-16</sup> with the modified formula:

$$\eta = \frac{hS(T_{\max,\text{mix}} - T_{\max,\text{s}})}{I(1 - 10^{-A_\lambda})} \times 100\%$$

where  $h$  is the heat transfer coefficient;  $S$  is the surface area of the cuvette;  $T_{\max,\text{mix}}$  is the maximum temperature of solvent with nanoparticles (54.8°C from Figure S9a), while  $T_{\max,\text{s}}$  is that of solvent alone after irradiation for the same time (31.2°C);  $I$  is the laser power ( $0.8 \text{ W/cm}^2 \times \pi \times (0.5 \text{ cm})^2 = 0.628 \text{ W}$ );  $A_\lambda$  is the absorbance of nanoparticles at the wavelength  $\lambda$  ( $A_{980} = 0.86$ ).  $hS$  can be calculated as follows:

$$hS = \frac{mC_{\text{water}}}{\tau_s}$$
$$\tau_s = -\frac{t}{\ln\theta} = -\frac{t}{\ln\frac{T - T_{\text{sur}}}{T_{\max,\text{mix}} - T_{\text{sur}}}}$$

where  $m$  is the mass of the sample solution (0.3 g);  $C_{\text{water}}$  is the heat capacity of water ( $4.2 \text{ J g}^{-1} \text{ K}^{-1}$ );  $\tau_s$  is the thermal time constant that can be determined as the slope by linear fit of the time point  $t$  vs  $(-\ln\theta)$  during the natural cooling period;  $T$  is the temperature at the time point  $t$ ;  $T_{\text{sur}}$  is the temperature of the surroundings.

According to Figure S9b,  $\tau_s$  is calculated as 181.6 s. Hence,

$$hS = \frac{mC_{\text{water}}}{\tau_s} = \frac{0.3 \text{ g} \times 4.2 \text{ J g}^{-1} \text{ K}^{-1}}{181.6 \text{ s}} = 0.00694 \text{ W K}^{-1}$$
$$\eta = \frac{hS(T_{\max,\text{mix}} - T_{\max,\text{s}})}{I(1 - 10^{-A_\lambda})} \times 100\% = \frac{0.00694 \text{ W K}^{-1} \times (327.95 \text{ K} - 304.35 \text{ K})}{0.628 \text{ W} \times (1 - 10^{-0.86})} \times 100\%$$
$$= \frac{0.1638 \text{ W}}{0.5413 \text{ W}} \times 100\% = 30.3\%$$

## REFERENCES

- (1) Yang, W.; Guo, W.; Le, W.; Lv, G.; Zhang, F.; Shi, L.; Wang, X.; Wang, J.; Wang, S.; Chang, J.; Zhang, B. Albumin-Bioinspired Gd:CuS Nanotheranostic Agent for In vivo Photoacoustic/Magnetic Resonance Imaging-Guided Tumor-Targeted Photothermal Therapy. *ACS Nano* **2016**, *10*, 10245-10257.
- (2) Tang, W.; Gao, H.; Ni, D.; Wang, Q.; Gu, B.; He, X.; Peng, W. Bovine Serum Albumin-templated Nanoplatfrom for Magnetic Resonance Imaging-Guided Chemodynamic Therapy. *J. Nanobiotechnol.* **2019**, *17*, 68.
- (3) Wen, R.; Lv, X.; Yang, T.; Li, Y.; Tang, Y.; Bai, X.; Ke, H.; Shen, J.; Chen, H. Albumin Nanoreactor-templated Synthesis of Gd<sub>2</sub>O<sub>3</sub>/CuS Hhybrid Nanodots for Cancer Theranostics. *Sci. China Mater.* **2017**, *60*, 554-562.
- (4) Shi, H.; Sun, Y.; Yan, R.; Liu, S.; Zhu, L.; Liu, S.; Feng, Y.; Wang, P.; He, J.; Zhou, Z.; Ye, D. Magnetic Semiconductor Gd-Doping CuS Nanoparticles as Activatable Nanoprobes for Bimodal Imaging and Targeted Photothermal Therapy of Gastric Tumors. *Nano Lett.* **2019**, *19*, 937-947.
- (5) Sun, H.; Zhang, Y.; Chen, S.; Wang, R.; Chen, Q.; Li, J.; Luo, Y.; Wang, X.; Chen, H. Photothermal Fenton Nanocatalysts for Synergetic Cancer Therapy in the Second Near-Infrared Window. *ACS Appl. Mater. Interfaces* **2020**, *12*, 30145-30154.
- (6) Zhu, L.; Gao, D.; Xie, L.; Dai, Y.; Zhao, Q. NIR II-Excited and pH-Responsive Ultrasmall Nanoplatfrom for Deep Optical Tissue and Drug Delivery Penetration and Effective Cancer Chemophototherapy. *Mol. Pharmaceutics* **2020**, *17*, 3720-3729.



- (7) Zhang, C.; Sun, W.; Wang, Y.; Xu, F.; Qu, J.; Xia, J.; Shen, M.; Shi, X. Gd-/CuS-Loaded Functional Nanogels for MR/PA Imaging-Guided Tumor-Targeted Photothermal Therapy. *ACS Appl. Mater. Interfaces* **2020**, *12*, 9107-9117.
- (8) Curcio, A.; Silva, A. K. A.; Cabana, S.; Espinosa, A.; Baptiste, B.; Menguy, N.; Wilhelm, C.; Abou-Hassan, A. Iron Oxide Nanoflowers @ CuS Hybrids for Cancer Tri-Therapy: Interplay of Photothermal Therapy, Magnetic Hyperthermia and Photodynamic Therapy. *Theranostics* **2019**, *9*, 1288-1302.
- (9) Ouyang, Z.; Li, D.; Xiong, Z.; Song, C.; Gao, Y.; Liu, R.; Shen, N.; Shi, X. Antifouling Dendrimer-Entrapped Copper Sulfide Nanoparticles Enable Photoacoustic Imaging-Guided Targeted Combination Therapy of Tumors and Tumor Metastasis. *ACS Appl. Mater. Interfaces* **2021**, *13*, 6069-6080.
- (10) Yu, Y.; Song, M.; Chen, C.; Du, Y.; Li, C.; Han, Y.; Yan, F.; Shi, Z.; Feng, S. Bortezomib-Encapsulated CuS/Carbon Dot Nanocomposites for Enhanced Photothermal Therapy via Stabilization of Polyubiquitinated Substrates in the Proteasomal Degradation Pathway. *ACS Nano* **2020**, *14*, 10688-10703.
- (11) Chen, W.; Wang, X.; Zhao, B.; Zhang, R.; Xie, Z.; He, Y.; Chen, A.; Xie, X.; Yao, K.; Zhong, M.; Yuan, M. CuS-MnS<sub>2</sub> Nano-flowers for Magnetic Resonance Imaging Guided Photothermal/Photodynamic Therapy of Ovarian Cancer Through Necroptosis. *Nanoscale* **2019**, *11*, 12983.
- (12) Ke, K.; Yang, W.; Xie, X.; Liu, R.; Wang, L. L.; Lin, W. W.; Huang, G.; Lu, C. H.; Yang, H. H. Copper Manganese Sulfide Nanoplates: A New Two-Dimensional Theranostic Nanoplatform for MRI/MSOT Dual-Modal Imaging-Guided

Photothermal Therapy in the Second Near-Infrared Window. *Theranostics* **2017**, *7*, 4763-4776.

(13) Deng, X.; Li, K.; Cai, X.; Liu, B.; Wei, Y.; Deng, K.; Xie, Z.; Wu, Z.; Ma, P.; Hou, Z. A Hollow-Structured CuS@Cu<sub>2</sub>S@Au Nanohybrid: Synergistically Enhanced Photothermal Efficiency and Photoswitchable Targeting Effect for Cancer Theranostics. *Adv. Mater.* **2017**, *29*, 1701266.

(14) Younis, M. R.; Wang, C.; An, R.; Wang, S.; Younis, M. A.; Liu, Z.; Wang, Y.; Ihsan, A.; Ye, D.; Xia, X. Low Power Single Laser Activated Synergistic Cancer Phototherapy Using Photosensitizer Functionalized Dual Plasmonic Photothermal Nanoagents. *ACS Nano* **2019**, *13*, 2544-2557.

(15) Ren, W.; Yan, Y.; Zeng, L.; Shi, Z.; Gong, A.; Schaaf, P.; Wang, D.; Zhao, J.; Zou, B.; Yu, H.; Chen, G.; Brown, E. M. B.; Wu, A. A Near Infrared Light Triggered Hydrogenated Black TiO<sub>2</sub> for Cancer Photothermal Therapy. *Adv. Healthcare Mater.* **2015**, *4*, 1526-1536.

(16) Liu, Y.; Ai, K.; Liu, J.; Deng, M.; He, Y.; Lu, L. Dopamine-Melanin Colloidal Nanospheres: An Efficient Near-Infrared Photothermal Therapeutic Agent for In vivo Cancer Therapy. *Adv. Mater.* **2013**, *25*, 1353-1359.
